# Supplementary material
Source: PubMed Central journal article supplement (PMC3780558)
Supplement: NIHMS492786-supplement-1.pdf [file NIHMS492786-supplement-1.pdf]

## Supplementary Fig. S1

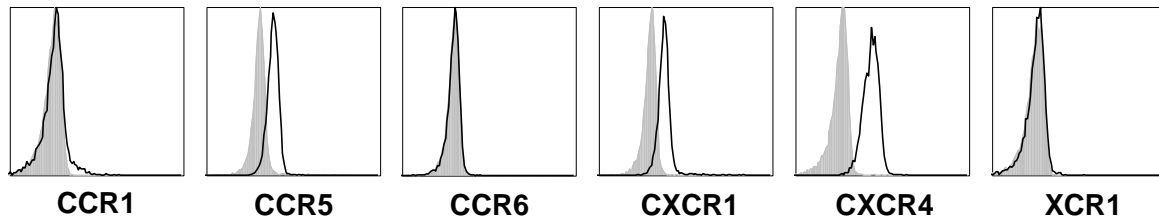

**Supplementary Figure S1.** Chemokine receptor expression on peripheral blood-isolated DCs. Representative surface expression (open histograms) of CCR1, CCR5, CCR6, CXCR1, CXCR4, and XCR1 on DCs isolated from healthy donor peripheral blood. Gray filled histograms represent isotype controls.

## Supplementary Fig. S2

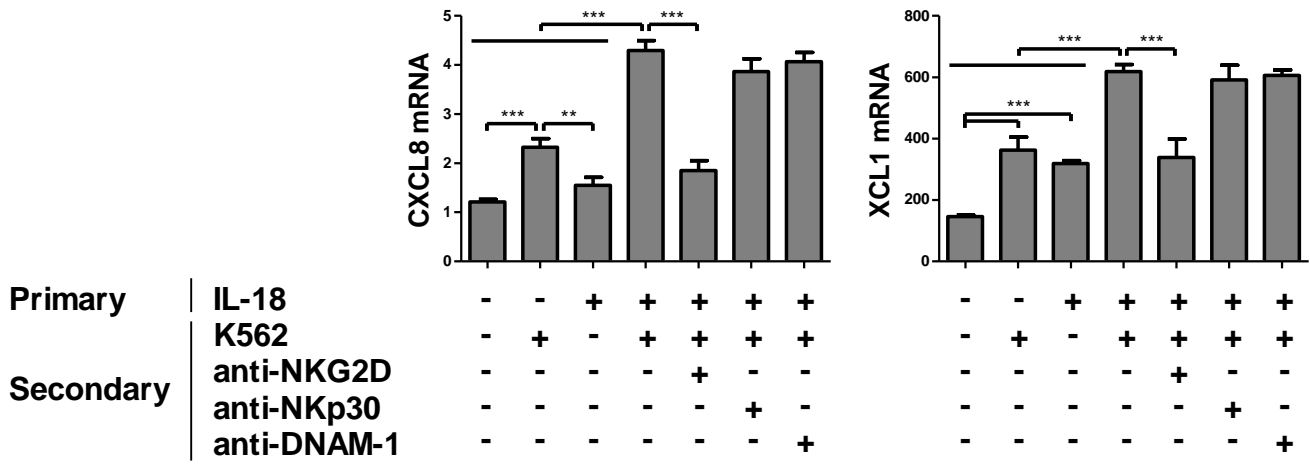

**Supplementary Figure S2.** IL-18 synergizes with K562 tumor cell recognition in inducing NK cell expression of DC-attracting chemokines. NK cells were pre-treated for 24 h in the absence or presence of IL-18, washed, and re-plated in the absence or presence of K562 cells (5:1 NK:K562 ratio). When indicated, NK cells were pre-treated for 30 min with blocking antibodies to NKG2D, NKp30, or DNAM-1 before co-culture with K562 cells. The expression of CXCL8 (left) and XCL1 (right) were analyzed after 4 h incubation with the secondary stimulus, and demonstrate a similar pattern to CCL3 and CCL4 (see Fig. 2B). Data are expressed as ratios between the expression of individual chemokine genes and HPRT1, and recorded as the mean expression ( $\pm$  SD) assayed in triplicate cultures. Data represent one of three independent experiments, which all yielded similar results. \*\*\* $p < 0.001$  compared to indicated groups.
